# Supplementary material
Source: PubMed Central journal article supplement (PMC5467110)
Supplement: Supp_Figure2.pdf [file Supp_Figure2.pdf]

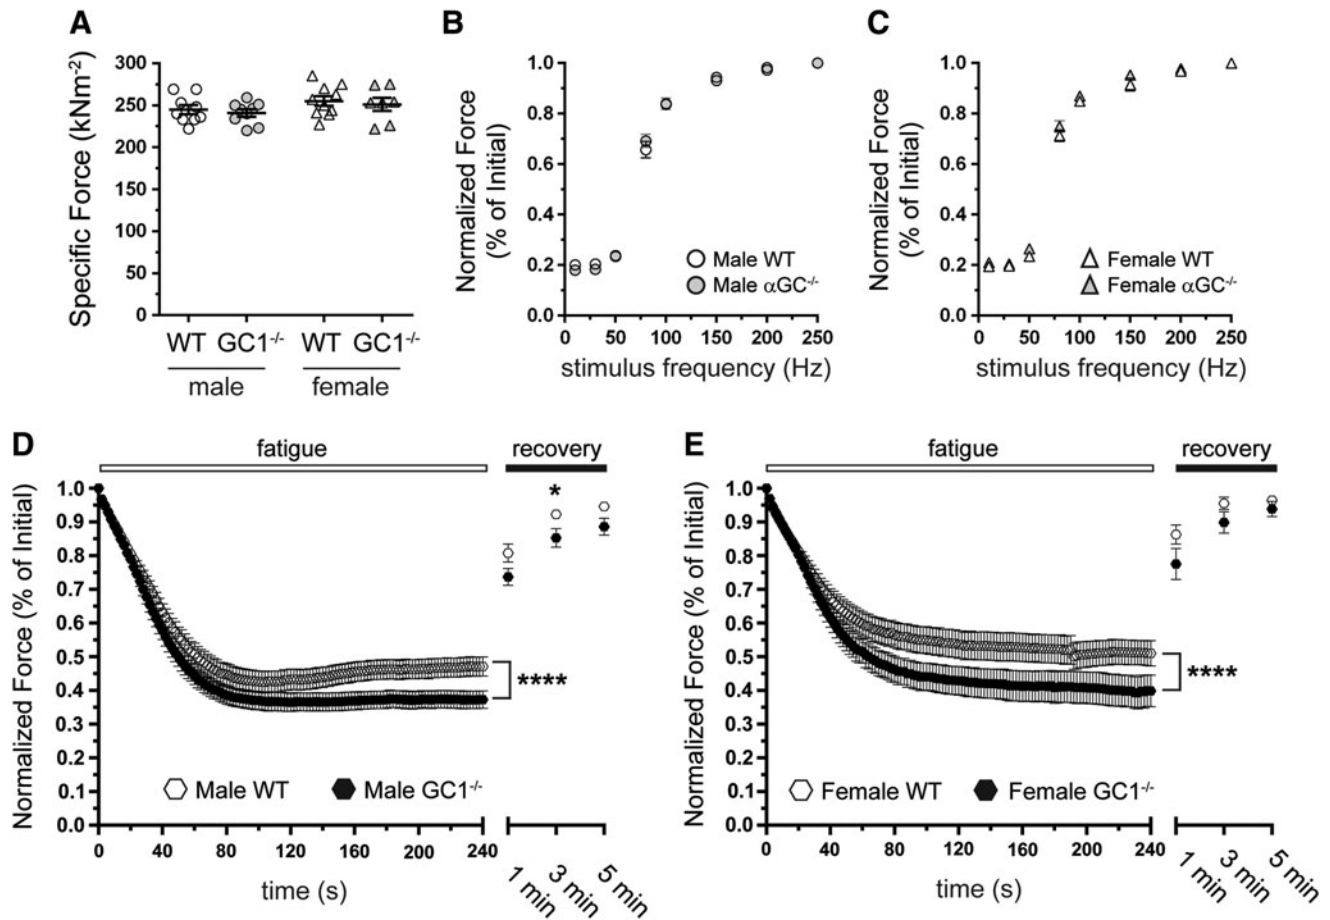

**SUPPLEMENTARY FIG. S2. GC1 deficiency promotes skeletal muscle fatigue in male and female mice.** (A) Specific force output in TA muscles from male and female WT and  $\text{GC1}^{-/-}$  mice. Specific force was similar between WT and  $\text{GC1}^{-/-}$  male and female TA muscles, indicating that GC1 is dispensable for normal muscle strength.  $n=9$  for male groups,  $n=10$  and  $7$  for female WT and  $\text{GC1}^{-/-}$  groups, respectively. (B) Force–frequency curves for TA muscles from male WT and  $\text{GC1}^{-/-}$  mice. Force output at different frequencies of stimulation was unaffected by loss of active GC1 consistent with normal gross neuromuscular synapse function.  $n=11$  for both groups. (C) Force–frequency curves for TA muscles from female WT and  $\text{GC1}^{-/-}$  mice. As seen in males, force–frequency curves were similar between WT and  $\text{GC1}^{-/-}$  mice, suggesting that GC1 is dispensable for neuromuscular transmission.  $n=7$  for both groups. (D) Contraction-induced fatigue resistance of TA muscles from male WT and  $\text{GC1}^{-/-}$  mice. GC1-deficient TA muscles were unable to sustain normal output during repeated stimulation and showed impaired force recovery.  $n=19$  and  $21$  for WT and  $\text{GC1}^{-/-}$  groups, respectively. (E) Contraction-induced fatigue resistance of TA muscles from female WT and  $\text{GC1}^{-/-}$  mice. As seen with males, GC1-deficient female TA muscles exhibited force deficits during repeated stimulation; however, force recovery was not significantly impacted, suggesting sex-specific roles for GC1 in force recovery after exercise.  $n=20$  and  $13$  for WT and  $\text{GC1}^{-/-}$  groups, respectively. (D, E)  $*p<0.05$ ;  $****p<0.0001$  from regular two-way ANOVA using genotype and time as variables with Tukey's multiple comparison test.
