# Supplementary material
Source: PubMed Central journal article supplement (PMC5467110)
Supplement: Supp_Figure3.pdf [file Supp_Figure3.pdf]

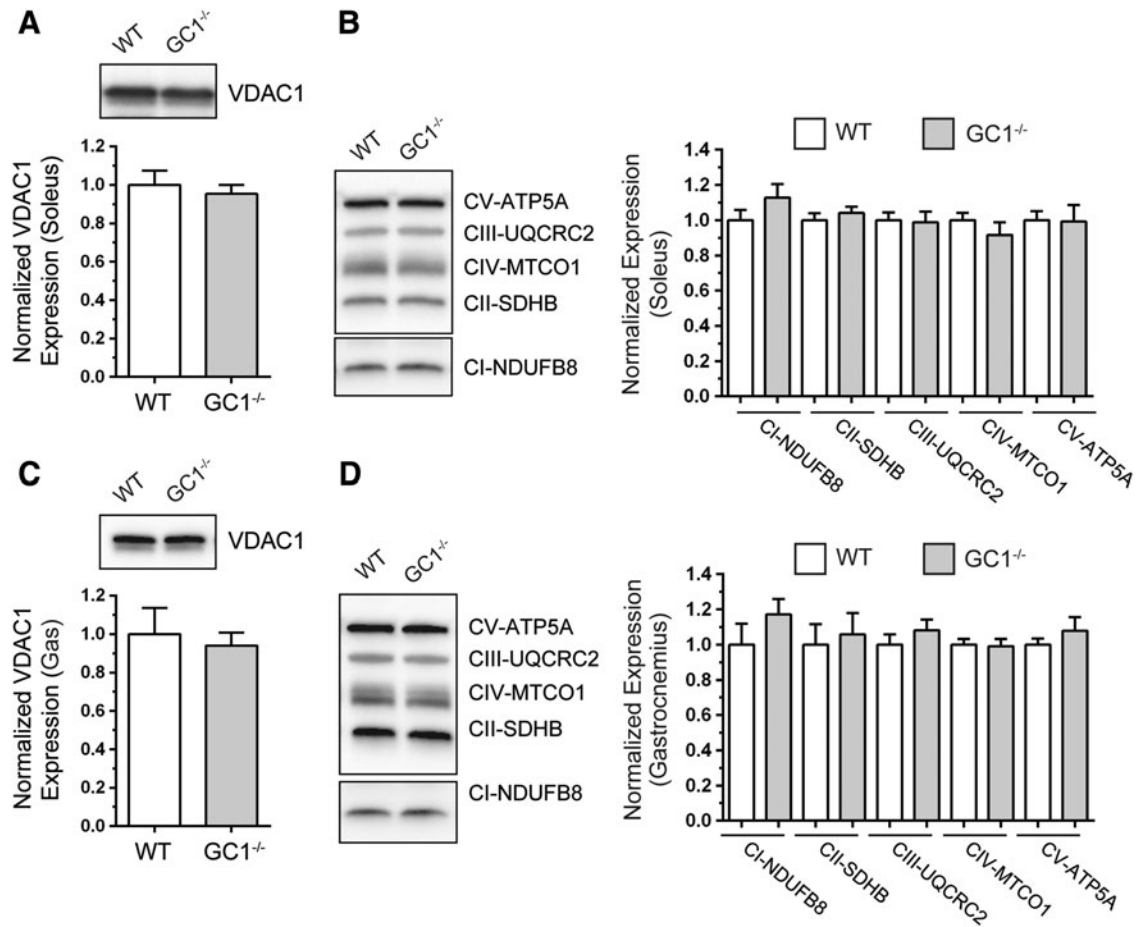

**SUPPLEMENTARY FIG. S3. GC1 is dispensable for establishing skeletal muscle mitochondrial content.** (A) Representative Western blot and densitometric quantitation of mitochondrial marker VDAC1 expression in oxidative soleus muscles. VDAC1 expression was unaffected in GC1<sup>-/-</sup> soleus muscle.  $n=6$  for both groups. (B) Representative Western blot and densitometric quantitation of mitochondrial respiratory complex subunit expression. Expression of ATP5A, UQCRC2, MTCO1, SDHB, and NDUFB8 was unaffected in GC1<sup>-/-</sup> soleus muscle.  $n=6$  for both groups. (C) Representative Western blot and densitometric quantitation of VDAC1 expression in gas muscles. VDAC1 expression was unaffected in GC1<sup>-/-</sup> gastrocnemius muscle.  $n=6$  for both groups. (D) Representative Western blot and densitometric quantitation of mitochondrial respiratory complex subunit expression. Complex I-V subunit expression was unaffected by loss of GC1 activity.  $n=6$  for both groups. These data support the data in Fig. 8 and suggest that GC1 is dispensable for normal mitochondrial content in skeletal muscles. Gas, gastrocnemius.
