# Supplementary material
Source: PubMed Central journal article supplement (PMC5467110)
Supplement: Supp_Figure4.pdf [file Supp_Figure4.pdf]

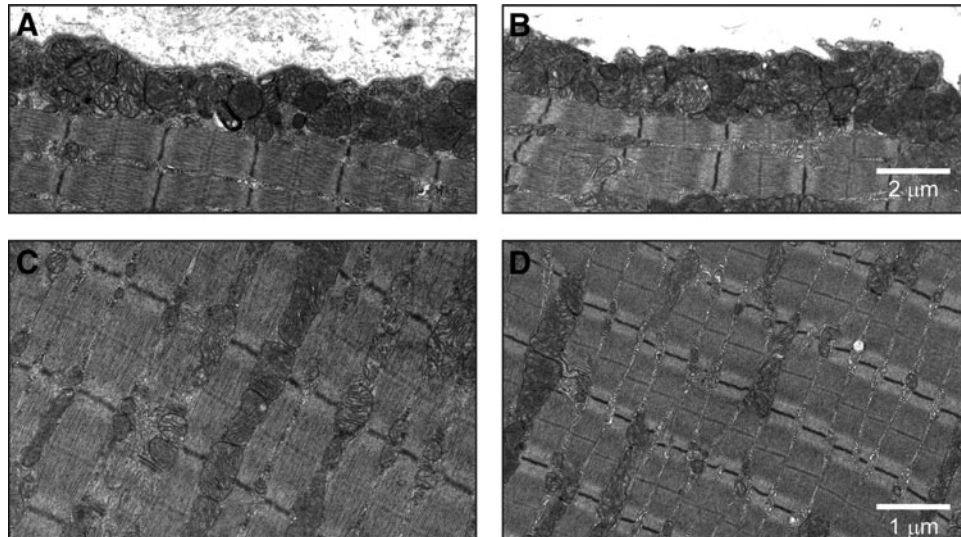

**SUPPLEMENTARY FIG. S4. Sildenafil treatment has no impact on mitochondrial ultrastructure.** (A) Representative transmission electron micrograph of SSM ultrastructure and morphology in WT TA muscle. (B) Representative transmission electron micrograph of subsarcolemmal mitochondrial ultrastructure and morphology in  $GC1^{-/-}$  TA muscle. SSM size, cristae alignment, and gross morphology were indistinguishable between WT and  $GC1^{-/-}$  muscle. Data are representative of 20–30 micrographs from 4 WT and 3  $GC1^{-/-}$  TA muscles. (C) Representative transmission electron micrograph of IFM ultrastructure and morphology in WT TA muscle. (D) Representative transmission electron micrograph of IFM ultrastructure and morphology in  $GC1^{-/-}$  TA muscle. IFM size, cristae alignment, and gross morphology were indistinguishable between WT and  $GC1^{-/-}$  muscle. Data are representative of 30 micrographs from 4 WT and 3  $GC1^{-/-}$  TA muscles. Thus, increased cGMP has no impact on mitochondrial size or ultrastructure. IFM, intermyofibrillar mitochondria; SSM, subsarcolemmal mitochondria.
